# Supplementary material
Source: HighWire-hosted journal article supplement (http://www.cmaj.ca/highwire/filestream/68021/field_highwire_adjunct_files/2/161351-res-3-at.pdf)
Supplement: 161351-res-3-at.pdf [file 161351-res-3-at.pdf]

**Appendix 3 (as supplied by the authors): Sensitivity analysis – crude mortality rates in individuals with and without schizophrenia after application of a stable prevalence to the annual schizophrenia cohorts**

| Year                                | Non-SCZ    |                        |                | SCZ                             |                                   |                | Between groups |        |
|-------------------------------------|------------|------------------------|----------------|---------------------------------|-----------------------------------|----------------|----------------|--------|
|                                     | No. Deaths | Population Denominator | Rate per 1,000 | Modified numerator <sup>a</sup> | Modified denominator <sup>a</sup> | Rate per 1,000 | RR             | RD     |
| 1993                                | 72,068     | 8,793,478              | 8.20           | 1,702                           | 83,124                            | 20.48          | 2.50           | 12.28  |
| 1994                                | 73,599     | 8,930,338              | 8.24           | 1,740                           | 84,463                            | 20.60          | 2.50           | 12.36  |
| 1995                                | 74,554     | 9,051,419              | 8.24           | 1,766                           | 85,648                            | 20.62          | 2.50           | 12.38  |
| 1996                                | 75,238     | 9,187,648              | 8.19           | 1,784                           | 86,970                            | 20.52          | 2.51           | 12.33  |
| 1997                                | 75,754     | 9,336,611              | 8.11           | 1,797                           | 88,414                            | 20.33          | 2.51           | 12.22  |
| 1998                                | 76,122     | 9,496,504              | 8.02           | 1,809                           | 89,959                            | 20.11          | 2.51           | 12.09  |
| 1999                                | 77,427     | 9,674,325              | 8.00           | 1,840                           | 91,671                            | 20.07          | 2.51           | 12.07  |
| 2000                                | 77,203     | 9,883,669              | 7.81           | 1,835                           | 93,679                            | 19.59          | 2.51           | 11.78  |
| 2001                                | 77,058     | 10,099,428             | 7.63           | 1,835                           | 95,746                            | 19.17          | 2.51           | 11.54  |
| 2002                                | 78,086     | 10,296,427             | 7.58           | 1,861                           | 97,632                            | 19.06          | 2.51           | 11.48  |
| 2003                                | 80,367     | 10,485,127             | 7.66           | 1,914                           | 99,439                            | 19.25          | 2.51           | 11.59  |
| 2004                                | 79,394     | 10,676,928             | 7.44           | 1,891                           | 101,283                           | 18.68          | 2.51           | 11.24  |
| 2005                                | 81,741     | 10,866,813             | 7.52           | 1,949                           | 103,111                           | 18.90          | 2.51           | 11.38  |
| 2006                                | 80,907     | 11,052,446             | 7.32           | 1,931                           | 104,902                           | 18.41          | 2.52           | 11.09  |
| 2007                                | 83,436     | 10,980,642             | 7.60           | 1,992                           | 104,260                           | 19.11          | 2.51           | 11.51  |
| 2008                                | 84,180     | 11,032,865             | 7.63           | 2,011                           | 104,786                           | 19.19          | 2.52           | 11.56  |
| 2009                                | 84,510     | 11,216,674             | 7.53           | 2,020                           | 106,557                           | 18.96          | 2.52           | 11.43  |
| 2010                                | 85,505     | 11,397,307             | 7.50           | 2,045                           | 108,295                           | 18.88          | 2.52           | 11.38  |
| 2011                                | 86,002     | 11,569,244             | 7.43           | 2,057                           | 109,953                           | 18.71          | 2.52           | 11.28  |
| 2012                                | 86,751     | 11,750,416             | 7.38           | 2,074                           | 111,695                           | 18.57          | 2.52           | 11.19  |
| <b>Absolute dif<sup>b</sup></b>     |            |                        | -0.82          |                                 |                                   | -1.91          | 0.02           | -1.09  |
| <b>Relative decline<sup>c</sup></b> |            |                        | -10.00%        |                                 |                                   | -9.30%         | 0.80%          | -8.90% |
| <b>P(trend)<sup>d</sup></b>         |            |                        | <.001          |                                 |                                   | <.001          | <.001          | <.001  |

Abbreviations: SCZ, individuals with schizophrenia; Non-SCZ, individuals without schizophrenia; RR, rate ratio; RD, rate difference.

<sup>a</sup>The prevalence of SCZ in 2012 ( $\frac{111,695}{111,695+11,750,416} * 100 = 0.94\%$ ) was applied to all SCZ denominators; the proportion of SCZ deaths in 2012

( $\frac{2,074}{2,074+86,751} * 100 = 2.33\%$ ) was applied to all SCZ numerators (see **Appendix 2** for original SCZ numerators and denominators); <sup>b</sup>Absolute difference in rates per 1,000 between 1993 and 2012; <sup>c</sup>Deltas ( $\delta$ ) indicate the relative difference between 1993 and 2012 rates, expressed as a percentage of the 1993 rate; <sup>d</sup>p-values for linear trend were obtained using unadjusted linear regressions; significant ( $P < 0.05$ ) trends between 1993 and 2012 are indicated by an asterisk\* in the figure.

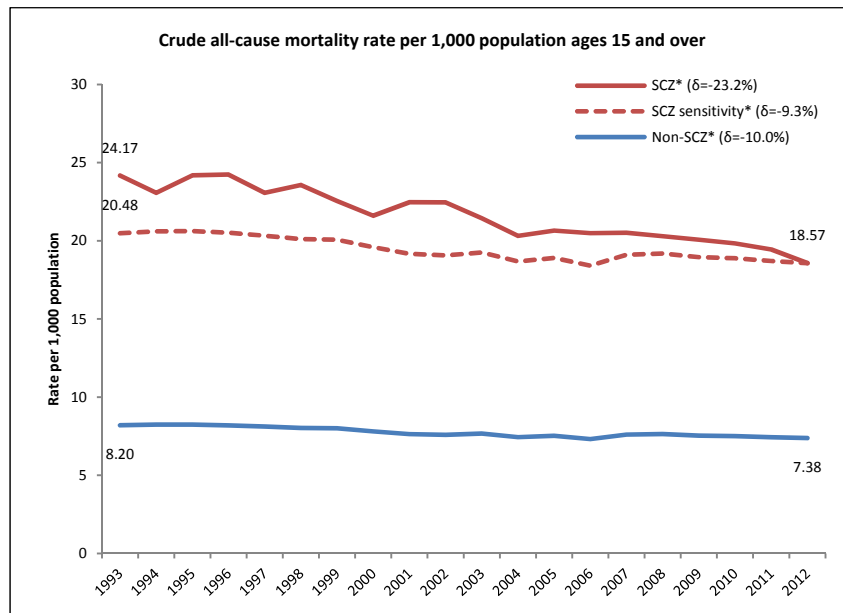

Appendix to: Gatov E, Rosella L, Chiu M, et al. Trends in standardized mortality among individuals with schizophrenia, 1993–2012: a population-based, repeated cross-sectional study. *CMAJ* 2017. DOI:10.1503/cmaj.161351.

Copyright © 2020 The Author(s) or their employer(s).

To receive this resource in an accessible format, please contact us at [cmajgroup@cmaj.ca](mailto:cmajgroup@cmaj.ca).
